# Supplementary material
Source: PubMed Central journal article supplement (PMC4340721)
Supplement: NIHMS641290-supplement-01.pdf [file NIHMS641290-supplement-01.pdf]

**Supplemental Table 1.** International Classification of Diseases codes used to electronically identify comorbidities among atrial fibrillation patients

| <b>Comorbidity</b>          | <b>ICD-9 Codes</b>                                                      |
|-----------------------------|-------------------------------------------------------------------------|
| Hypertension                | 401-405, 437.2<br>642.0-642.2                                           |
| Diabetes                    | 250                                                                     |
| Heart failure               | 428                                                                     |
| Myocardial infarction       | 410, 412                                                                |
| Chronic pulmonary disease   | 494-496<br>500-505, 506.4                                               |
| Peripheral vascular disease | 440.20, 440.22-440.8, 442<br>443.1-443.80, 443.82-443.9<br>785.4, V43.4 |
| Cerebrovascular disease     | 430-438                                                                 |
| Liver disease               | 452, 453.0<br>456.0-456.21<br>571.2, 571.4-571.6<br>572.2-572.8         |

---

|                        |                                                   |
|------------------------|---------------------------------------------------|
| Renal disease          | 582.0-582.8, 583.0-583.7<br>585.3-585.6           |
| Rheumatologic disease  | 710.0, 710.1, 710.4<br>714.0-714.2, 714.81<br>725 |
| Malignancy             | 140-172, 174-195.8<br>200-208                     |
| Metastatic solid tumor | 196-198.1, 198.3-199                              |
| Dementia               | 290<br>331.0-331.2, 331.6-331.8                   |
| Hemiplegia/paraplegia  | 342, 344                                          |

---
